# Supplementary material
Source: MDPI journal article supplement (https://www.mdpi.com/2078-1547/14/4/49)
Supplement: s1 [file s1]

Archive with 6 entries (6 files):
- supplemental files/Supplemental file S1 program_planetary_health_covening.pdf
- supplemental files/Supplemental file S2 speakers-planetary-health-2023.pdf
- supplemental files/Supplemental file S3 Lunch-workshops-Planetary-Health-2023.pdf
- supplemental files/Supplemental file S4 Workshop-The Future of Planetary Health Cities.pdf
- supplemental files/Supplemental file S5  Schematic overview of the EU-funded projects related to Food Health and Living Environment.pdf
- supplemental files/Supplemental file S6 Symbiosis-planetary health 2023.pdf
