# Supplementary material
Source: MDPI journal article supplement (https://www.mdpi.com/2078-1547/14/4/49)
Supplement: s1 [file s1]

**Supplemental files S5: Schematic overview of the EU-funded projects related to Food, Health, and Living Environment (FHLE) relevant for the Impact through Synergy Workshop.**

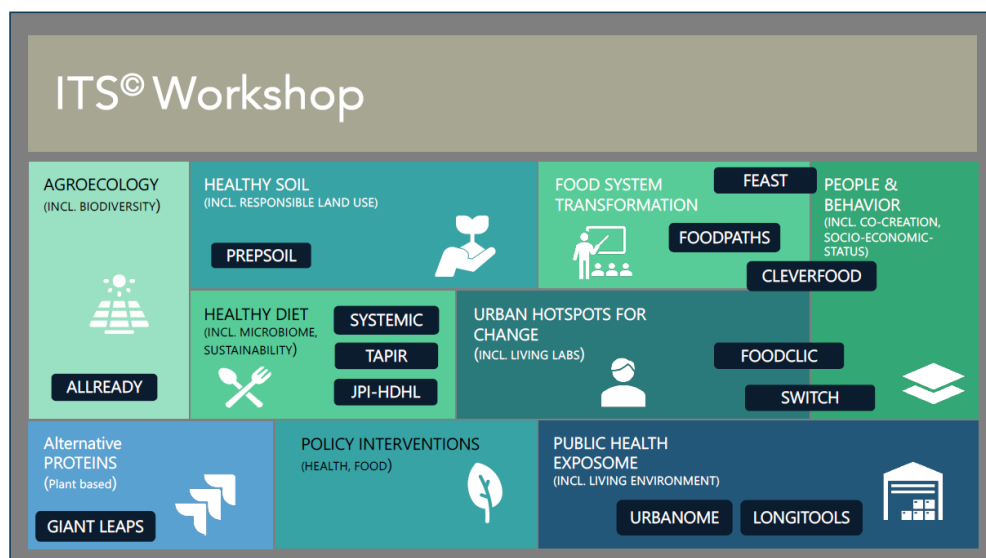

For more information about these EU-funded projects see the links below:

**ALLREADY** <https://www.all-ready-project.eu/index.html>

**GIANT LEAPS** <https://giantleaps.eu/>

**PREPSOIL** <https://prepsoil.eu/>

**SYSTEMIC** <https://systemicproject.eu/>

**TAPIR** <https://www.wur.nl/en/project/the-impact-of-a-wide-variety-of-dietary-lipids-on-microbiota-composition-and-functionality.htm>

**JPI-HDHL** <https://www.healthydietforhealthylife.eu/?jjj=1698746578247>

**FEAST** <https://feast2030.eu/>

**FOODPATHS** <https://www.foodpaths.eu/>

**CLEVERFOOD** <https://food2030.eu/> and <https://vu.nl/en/about-vu/research-institutes/athena-institute/more-about/projects-cleverfood-athena-institute>

**FOODCLIC** <https://foodclic.eu/> and <https://vu.nl/en/about-vu/research-institutes/athena-institute/more-about/projects-foodclic-athena-institute>

**SWITCH** <https://switch-fch.eu/>

**URBANOME** <https://www.urbanome.eu/>

**LONGITOOLS** <https://longitools.org/>
