# Supplementary material
Source: MDPI journal article supplement (https://www.mdpi.com/2078-1547/14/4/49)
Supplement: s1 [file s1 › supplemental files/Supplemental file S1 program_planetary_health_covening.pdf]

# Timetable Planetary Health Congress 2023

| Wednesday July 5th 2023 |                                                                                                                                                           |              |
|-------------------------|-----------------------------------------------------------------------------------------------------------------------------------------------------------|--------------|
| 13.30 -17.00            | <b>Workshop</b><br>The Future of Planetary Health Cities and Political Leadership led by Ralf Klemens Stappen, Josep Maria Antó, Joyce Brown, Marju Prass | Koningszaal  |
| 18.30                   | Welcome dinner & drinks                                                                                                                                   | De Waterkant |

For detailed information about the speakers, click here

| THEME |                                                                                     |
|-------|-------------------------------------------------------------------------------------|
| EARTH | 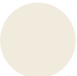 |
| WATER | 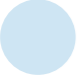 |
| FOOD  | 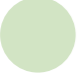 |
| HUMAN | 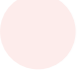 |

| Thursday July 6th 2023 |                                                                                                                                                                 |             |
|------------------------|-----------------------------------------------------------------------------------------------------------------------------------------------------------------|-------------|
| 9.00-9.30              | WALK-IN + COFFEE                                                                                                                                                | Tijgerzaal  |
| 9.30-9.45              | Welcome address by Remco Kort and Evanne Nowak                                                                                                                  | Tijgerzaal  |
| 9.45-10.15             | Opening by Femke Halsema (Mayor of Amsterdam) and Rembrandt Sutorius (Director of ARTIS)                                                                        | Koningszaal |
| 10.15-10.45            | <b>Planetary Health:</b> A New Paradigm that Combines the Health of the People and the Planet by Josep Maria Antó                                               | Koningszaal |
| 10.45-11.15            | From global health security to Planetary Health solidarity by Alexandre Robert                                                                                  | Koningszaal |
| 11.15 - 11.30          | BREAK                                                                                                                                                           | Tijgerzaal  |
| 11.30-12.00            | Two sides of the rewilding coin: on the necessity of ecological and human rewilding by Koen Arts                                                                | Koningszaal |
| 12.00-12.25            | A novel perspective on agroecological transitions by Matty Berg                                                                                                 | Koningszaal |
| 12.30-13.30            | LUNCH                                                                                                                                                           | Tijgerzaal  |
| 13.30-14.00            | Listen to the oceans by Hans Slabbekoorn                                                                                                                        | Koningszaal |
| 14.00-14.30            | Climate change and the aquatic microorganisms of lakes and oceans by Jef Huisman                                                                                | Koningszaal |
| 14.30-15.00            | Rights for the Wadden Sea by Jessica den Outer                                                                                                                  | Koningszaal |
| 15.00-15.30            | BREAK                                                                                                                                                           | Tijgerzaal  |
| 15.30-15.50            | Report on the outcomes of the workshop on the future of Planetary Health cities - The role of political leadership by Ralf Klemens Stappen and Josep Maria Anto | Koningszaal |
| 15.50-16.10            | Report on the TKI synergy. Meeting by Michiel Roelse                                                                                                            | Koningszaal |
| 16.10-16.30            | Summary of the KNAW research agenda by Pim Martens                                                                                                              | Koningszaal |
| 16.30-16.50            | The European Planetary Health Hub by Martine Veenman                                                                                                            | Koningszaal |

| PLANETARIUM July 6th 2023 |                                                                                                  |  |
|---------------------------|--------------------------------------------------------------------------------------------------|--|
| 17.15-18.15               | Concert SYMBIOSIS by Maya Fridman, Gustavo Trujilo, Wim van Egmond, Milo Grootjen and Remco Kort |  |
| 18.15                     | DRINKS & BITES                                                                                   |  |

| Friday July 7th 2023 |                                                                                                                                                                                                                                                                                                                                                                                |                 |
|----------------------|--------------------------------------------------------------------------------------------------------------------------------------------------------------------------------------------------------------------------------------------------------------------------------------------------------------------------------------------------------------------------------|-----------------|
| 9.30-10.00           | WALK-IN + COFFEE                                                                                                                                                                                                                                                                                                                                                               | Tijgerzaal      |
| 10.00-10.30          | The Planetary Health win-win diet by Jaap Seidell                                                                                                                                                                                                                                                                                                                              | Koningszaal     |
| 10.30-11.00          | The transition to a sustainable food system by Frederike Praasterink                                                                                                                                                                                                                                                                                                           | Koningszaal     |
| 11.00-11.30          | Urban Food Hubs as catalysts for healthy cities for humans and non-humans - Worldwide examples, principles and challenges by Marian Stuiver                                                                                                                                                                                                                                    | Koningszaal     |
| 11.30-12.00          | BREAK                                                                                                                                                                                                                                                                                                                                                                          | Tijgerzaal      |
| 12.00-14.00          | <b>LUNCH AND ZOO VISIT</b>                                                                                                                                                                                                                                                                                                                                                     | ARTIS Zoo       |
| 12.00-14.00          | <b>LUNCH WORKSHOP</b><br>Food & Microbes by Bruno Pot (Science Director Yakult and affiliated with Vrije Universiteit Brussel)<br>Recommended Dietary Intake of Microbes by Colin Hill (Professor of Microbial Food Safety at University College Cork)<br>Design of Fermented Foods by Christian Weij (Creative director SmaakPark, food designer and fermentation specialist) | Koningszaal     |
| 12.00-14.00          | <b>LUNCH WORKSHOP</b><br>Movement Building by Jorieke van der Stelt (De Duurzame Dokter, tropical physician), Juliette Matthijsen en Jopke Janmaat                                                                                                                                                                                                                             | Noord-Paviljoen |
| 12.00-14.00          | <b>LUNCH WORKSHOP</b><br>Planetary Health Education with Jennifer Cole (Lecturer of global and planetary health)                                                                                                                                                                                                                                                               | Tijgerzaal      |
| 14.00-14.30          | The need for safe and just Earth system boundaries by Joyeeta Gupta                                                                                                                                                                                                                                                                                                            | Koningszaal     |
| 14.30-15.00          | The More-than-Planet by Marleen Stikker                                                                                                                                                                                                                                                                                                                                        | Koningszaal     |
| 15.00-15.30          | An entangled life with animals and the planet by Pim Martens                                                                                                                                                                                                                                                                                                                   | Koningszaal     |
| 15.30-16.00          | BREAK                                                                                                                                                                                                                                                                                                                                                                          | Tijgerzaal      |
| 16.00-16.15          | Report back on workshops and Planetary Health Education by Jennifer Cole                                                                                                                                                                                                                                                                                                       | Koningszaal     |
| 16.15-16.30          | Report back on workshop Movement Building by Jorieke van der Stelt                                                                                                                                                                                                                                                                                                             | Koningszaal     |
| 16.30-17.00          | Concluding remarks/wrap up by Remco Kort & Evanne Nowak                                                                                                                                                                                                                                                                                                                        | Koningszaal     |
| 17.00                | CLOSING DRINKS                                                                                                                                                                                                                                                                                                                                                                 | Tijgerzaal      |
